# Supplementary material for: CDK7 inhibition augments the response against multidrug chemotherapy in pancreatic cancer
Source: Research Square preprint supplement (doi:10.21203/rs.3.rs-1333955/v1), 2022-02-16
Supplement: Supplementary file 1 [file fe2364d11ae5aa4d84ae859f.xlsx]

## Sheet: antibody list
	Antibodies	Source	Identifier
	Phospho-Rpb1 CTD (Ser7)	Cell Signaling	Cat# 13780, RRID:AB_2687900
	Mouse Anti-Cdk7 Monoclonal antibody	Santa Cruz Biotechnology	Cat# sc-7344, RRID:AB_627243
	Stat3 (D3Z2G) Rabbit mAb	Cell Signaling	Cat# 14047, RRID:AB_2728821
	Phospho-Stat3 (Tyr705) (D3A7) XP Rabbit mAb	Cell Signaling	Cat# 9145, RRID:AB_2491009
	Chk1 (2G1D5) Mouse mAb	Cell Signaling	Cat# 2360, RRID:AB_2080320
	Phospho-Chk1 (Ser296) Antibody	Cell Signaling	Cat# 2349, RRID:AB_2080323
	Mcl-1 (D35A5) Rabbit mAb	Cell Signaling	Cat# 5453, RRID:AB_10694494
	PARP Antibody	Cell Signaling	Cat# 9542, RRID:AB_2160739
	Wee1 (D10D2) Rabbit mAb	Cell Signaling	Cat# 13084, RRID:AB_2713924
	Phospho-Wee1 (Ser642) (D47G5) Rabbit mAb	Cell Signaling	Cat# 4910, RRID:AB_2215870
	Phospho-cdc2 (Tyr15) Antibody	Cell Signaling	Cat# 9111, RRID:AB_331460
	Phospho-CDK2 (Thr160) Antibody	Cell Signaling	Cat# 2561, RRID:AB_2078685
	Vinculin (E1E9V) XP® antibody	Cell Signaling	Cat# 13901, RRID:AB_2728768
	β-Tubulin (D2N5G) Rabbit mAb	Cell Signaling	Cat# 15115, RRID:AB_2798712
	β-Actin (D6A8) Rabbit mAb	Cell Signaling	Cat# 8457, RRID:AB_10950489
	Phospho-Histone H2A.X (Ser139) (20E3) Rabbit mAb	Cell Signaling	Cat# 9718, RRID:AB_2118009
	Anti-rabbit IgG, HRP-linked Antibody	Cell Signaling	Cat# 7074, RRID:AB_2099233
	Anti-mouse IgG, HRP-linked Antibody	Cell Signaling	Cat# 7076, RRID:AB_330924
	Goat anti-Rabbit IgG (H+L) Highly Cross-Adsorbed Secondary Antibody, Alexa Fluor 488	Thermo Fisher Scientific	Cat# A-11034, RRID:AB_2576217
